# Supplementary material for: Effects of Thermal and High-Pressure Processing on Quality Features and the Volatile Profiles of Cloudy Juices Obtained from Golden Delicious, Pinova, and Red Delicious Apple Cultivars
Source: MDPI journal article supplement (doi:10.3390/foods10123046), 2021-12-08
Supplement: s1 [file s1]

## Supplementary materials

**Table S1.** Characterization of the fruit's volatile fraction of three apple cultivars.

| Compounds |                                | Golden Delicious |     | Pinova |       |         | Red Delicious |       |         |
|-----------|--------------------------------|------------------|-----|--------|-------|---------|---------------|-------|---------|
|           |                                | ppm              | ±SD |        | ppm   | ±S<br>D |               | ppm   | ±S<br>D |
| 1         | Hexanal                        | 1.741            | 0.4 |        | 1.305 | 0.3     |               | 1.344 | 0.3     |
| 2         | Heptanal                       | 0.046            | 0.0 |        | 0.000 | 0.0     |               | 0.000 | 0.0     |
| 3         | 2-Hexenal                      | 1.315            | 0.4 |        | 1.382 | 0.3     |               | 1.416 | 0.1     |
| 4         | Octanal                        | 0.017            | 0.0 | a      | 0.000 | 0.0     | b             | 0.015 | 0.0     |
| 5         | 2-Heptenal                     | 0.000            | 0.0 | b      | 0.056 | 0.0     | a             | 0.000 | 0.0     |
| 6         | Nonanal                        | 0.059            | 0.0 |        | 0.043 | 0.0     |               | 0.049 | 0.0     |
| 7         | 2-Octenal                      | 0.000            | 0.0 | b      | 0.038 | 0.0     | a             | 0.000 | 0.0     |
| 8         | Decanal                        | 0.029            | 0.0 |        | 0.035 | 0.0     |               | 0.032 | 0.0     |
| 9         | Benzaldehyde                   | 0.000            | 0.0 | b      | 0.036 | 0.0     | a             | 0.037 | 0.0     |
| 10        | 2-Nonenal                      | 0.000            | 0.0 | b      | 0.019 | 0.0     | a             | 0.022 | 0.0     |
| 11        | Benzenacetaldehyde             | 0.000            | 0.0 |        | 0.052 | 0.0     |               | 0.052 | 0.0     |
| 12        | Isobutyl acetate               | 0.000            | 0.0 | b      | 0.028 | 0.0     | a             | 0.036 | 0.0     |
| 13        | Isoamyl acetate                | 0.052            | 0.0 | b      | 0.710 | 0.1     | a             | 0.529 | 0.0     |
| 14        | (E)-2-Methyl-2-butenyl acetate | 0.000            | 0.0 | b      | 0.046 | 0.0     | a             | 0.040 | 0.0     |
| 15        | Amylbutyrate                   | 0.000            | 0.0 | b      | 0.013 | 0.0     | a             | 0.017 | 0.0     |
| 16        | Hexyl acetate                  | 0.035            | 0.0 | b      | 0.149 | 0.0     | a             | 0.165 | 0.0     |

|    |                                |       |     |       |       |       |     |       |     |   |
|----|--------------------------------|-------|-----|-------|-------|-------|-----|-------|-----|---|
| 17 | 2-Hexenyl acetate              | 0.000 | 0.0 | 0.000 | 0.0   | 0.027 | 0.0 |       |     |   |
| 18 | Butylcaproate                  | 0.118 | 0.0 | 0.025 | 0.0   | 0.026 | 0.0 |       |     |   |
| 19 | Hexylbutyrate                  | 0.124 | 0.1 | 0.077 | 0.0   | 0.077 | 0.0 |       |     |   |
| 20 | Hexyl n-valerate               | 1.189 | 0.5 | 0.129 | 0.0   | 0.135 | 0.0 |       |     |   |
| 21 | Isoamylcaproate                | 0.050 | 0.0 | 0.060 | 0.0   | 0.063 | 0.0 |       |     |   |
| 22 | 2-hexenyl butyrate             | 0.000 | 0.0 | b     | 0.033 | 0.0   | a   | 0.038 | 0.0 | a |
| 23 | cis-3-Hexenyl 2-methylbutyrate | 0.000 | 0.0 | 0.000 | 0.0   | 0.037 | 0.0 |       |     |   |
| 24 | Pentylhexanoate                | 0.039 | 0.0 | 0.000 | 0.0   | 0.000 | 0.0 |       |     |   |
| 25 | Isobutyloctanoate              | 0.000 | 0.0 | 0.013 | 0.0   | 0.012 | 0.0 |       |     |   |
| 26 | Prenylcaproate                 | 0.000 | 0.0 | 0.000 | 0.0   | 0.018 | 0.0 |       |     |   |
| 27 | Hexylcaproate                  | 0.792 | 0.2 | 0.000 | 0.0   | 0.137 | 0.0 |       |     |   |
| 28 | butylcaprylate                 | 0.092 | 0.0 | 0.016 | 0.0   | 0.019 | 0.0 |       |     |   |
| 29 | 2-methylbutyl octanoate        | 0.048 | 0.0 | 0.071 | 0.0   | 0.074 | 0.0 |       |     |   |
| 30 | (E)-2-Hexenyl hexanoate        | 0.000 | 0.0 | 0.021 | 0.0   | 0.019 | 0.0 |       |     |   |
| 31 | Phenylmethyl acetate           | 0.000 | 0.0 | 0.000 | 0.0   | 0.011 | 0.0 |       |     |   |
| 32 | Hexylcaprylate                 | 0.023 | 0.0 | 0.000 | 0.0   | 0.000 | 0.0 |       |     |   |
| 33 | Butanol                        | 0.030 | 0.0 | 0.000 | 0.0   | 0.000 | 0.0 |       |     |   |
| 34 | Isolamylalcohol                | 0.126 | 0.0 | 0.215 | 0.1   | 0.225 | 0.0 |       |     |   |
| 35 | Hexanol                        | 0.944 | 0.3 | 0.719 | 0.3   | 0.733 | 0.2 |       |     |   |
| 36 | 3-Hexen-1-ol                   | 0.000 | 0.0 | b     | 0.020 | 0.0   | a   | 0.021 | 0.0 | a |
| 37 | 2-Hexen-1-ol                   | 0.084 | 0.0 |       | 0.174 | 0.1   |     | 0.177 | 0.1 |   |
| 38 | 1 Octen-3-ol                   | 0.000 | 0.0 | b     | 0.017 | 0.0   | a   | 0.018 | 0.0 | a |
| 39 | 6-Methyl-5-hepten-2-ol         | 0.000 | 0.0 |       | 0.054 | 0.0   |     | 0.055 | 0.0 |   |

|    |                             |       |     |       |       |       |     |       |     |   |
|----|-----------------------------|-------|-----|-------|-------|-------|-----|-------|-----|---|
| 40 | 2-Ethyl-1-hexanol           | 0.054 | 0.0 | 0.052 | 0.0   | 0.055 | 0.0 |       |     |   |
| 41 | PhenylethylAlcohol          | 0.000 | 0.0 | 0.000 | 0.0   | 0.029 | 0.0 |       |     |   |
| 42 | $\beta$ -Myrcene            | 0.000 | 0.0 | 0.092 | 0.0   | 0.000 | 0.0 |       |     |   |
| 43 | Estragole                   | 0.034 | 0.0 | 0.049 | 0.0   | 0.053 | 0.0 |       |     |   |
| 44 | (Z, E)- $\alpha$ -farnesene | 0.000 | 0.0 | 0.000 | 0.0   | 0.018 | 0.0 |       |     |   |
| 45 | (E, E)- $\alpha$ -farnesene | 4.670 | 1.8 | 1.897 | 0.3   | 2.006 | 0.2 |       |     |   |
| 46 | Sulcatone                   | 0.184 | 0.1 | 0.141 | 0.0   | 0.146 | 0.0 |       |     |   |
| 47 | butyrolactone               | 0.115 | 0.0 | 0.000 | 0.0   | 0.000 | 0.0 |       |     |   |
| 48 | Dodecane                    | 0.000 | 0.0 | b     | 0.144 | 0.0   | a   | 0.150 | 0.0 | a |
| 49 | Tridecane                   | 0.104 | 0.0 | b     | 0.287 | 0.1   | a   | 0.278 | 0.0 | a |

---

Values in same row, followed by different letters, are statistically different. One way ANOVA, Tukey's test ( $p \leq 0.05$ )

---

**Table S2.** Influence of cultivar and pasteurization treatments on the apple juice volatile fraction.

| Compounds |                                | Golden Delicious |     |       |     |       |     | Pinova |     |       |     |       |     | Red Delicious |     |       |     |       |     | Factors |       |        |
|-----------|--------------------------------|------------------|-----|-------|-----|-------|-----|--------|-----|-------|-----|-------|-----|---------------|-----|-------|-----|-------|-----|---------|-------|--------|
|           |                                | NT               |     | TT    |     | HPP   |     | NT     |     | TT    |     | HPP   |     | NT            |     | TT    |     | HPP   |     | CV      | TT    | CV*TT  |
|           |                                | ppm              | ±SD | ppm   | ±SD | ppm   | ±SD | ppm    | ±SD | ppm   | ±SD | ppm   | ±SD | ppm           | ±SD | ppm   | ±SD | ppm   | ±SD |         |       |        |
| 1         | Hexanal                        | 0,610            | 0,0 | 0,533 | 0,4 | 3,374 | 0,0 | 2,902  | 1,1 | 1,222 | 0,2 | 1,565 | 0,2 | 3,106         | 1,3 | 1,355 | 0,3 | 0,826 | 0,1 | 0,542   | 0,020 | 0,0022 |
| 2         | Heptanal                       | 0,000            | 0,0 | 0,019 | 0,0 | 0,032 | 0,0 | 0,000  | 0,0 | 0,000 | 0,0 | 0,000 | 0,0 | 0,000         | 0,0 | 0,000 | 0,0 | 0,000 | 0,0 | 0,000   | 0,000 | 0,000  |
| 3         | 2-Hexenal                      | 1,099            | 0,0 | 0,908 | 0,3 | 2,101 | 0,1 | 2,567  | 0,0 | 1,983 | 0,1 | 2,383 | 0,2 | 2,785         | 0,1 | 3,120 | 1,0 | 2,264 | 0,6 | 0,001   | 0,606 | 0,047  |
| 4         | Octanal                        | 0,000            | 0,0 | 0,000 | 0,0 | 0,015 | 0,0 | 0,000  | 0,0 | 0,015 | 0,0 | 0,013 | 0,0 | 0,000         | 0,0 | 0,000 | 0,0 | 0,000 | 0,0 | 0,000   | 0,000 | 0,000  |
| 5         | 2-Heptenal                     | 0,000            | 0,0 | 0,023 | 0,0 | 0,069 | 0,0 | 0,000  | 0,0 | 0,000 | 0,0 | 0,000 | 0,0 | 0,000         | 0,0 | 0,000 | 0,0 | 0,000 | 0,0 | 0,000   | 0,001 | 0,000  |
| 6         | Nonanal                        | 0,029            | 0,0 | 0,000 | 0,0 | 0,041 | 0,0 | 0,022  | 0,0 | 0,018 | 0,0 | 0,000 | 0,0 | 0,000         | 0,0 | 0,000 | 0,0 | 0,000 | 0,0 | 0,000   | 0,000 | 0,000  |
| 7         | 2-Octenal                      | 0,000            | 0,0 | 0,000 | 0,0 | 0,070 | 0,0 | 0,000  | 0,0 | 0,030 | 0,0 | 0,000 | 0,0 | 0,000         | 0,0 | 0,000 | 0,0 | 0,000 | 0,0 | 0,000   | 0,000 | 0,000  |
| 8         | Furfural                       | 0,000            | 0,0 | 0,000 | 0,0 | 0,056 | 0,0 | 0,000  | 0,0 | 0,054 | 0,0 | 0,037 | 0,0 | 0,000         | 0,0 | 0,058 | 0,0 | 0,000 | 0,0 | 0,133   | 0,000 | 0,000  |
| 9         | Decanal                        | 0,009            | 0,0 | 0,010 | 0,0 | 0,031 | 0,0 | 0,020  | 0,0 | 0,030 | 0,0 | 0,036 | 0,0 | 0,023         | 0,0 | 0,033 | 0,0 | 0,014 | 0,0 | 0,167   | 0,274 | 0,149  |
| 10        | Benzaldehyde                   | 0,067            | 0,0 | 0,212 | 0,2 | 0,768 | 0,6 | 0,039  | 0,0 | 0,027 | 0,0 | 0,042 | 0,0 | 0,048         | 0,0 | 0,031 | 0,0 | 0,047 | 0,0 | 0,041   | 0,157 | 0,152  |
| 11        | 2-Nonenal                      | 0,004            | 0,0 | 0,000 | 0,0 | 0,025 | 0,0 | 0,009  | 0,0 | 0,007 | 0,0 | 0,000 | 0,0 | 0,010         | 0,0 | 0,010 | 0,0 | 0,000 | 0,0 | 0,019   | 0,134 | 0,000  |
| 12        | Benzenacetaldehyde             | 0,000            | 0,0 | 0,000 | 0,0 | 0,000 | 0,0 | 0,018  | 0,0 | 0,000 | 0,0 | 0,057 | 0,0 | 0,017         | 0,0 | 0,015 | 0,0 | 0,026 | 0,0 | 0,000   | 0,000 | 0,000  |
| 13        | 2,4-Decadienal                 | 0,000            | 0,0 | 0,000 | 0,0 | 0,016 | 0,0 | 0,000  | 0,0 | 0,000 | 0,0 | 0,000 | 0,0 | 0,000         | 0,0 | 0,000 | 0,0 | 0,000 | 0,0 | 0,004   | 0,004 | 0,002  |
| 14        | 2,5-Dimethyl-benzaldehyde      | 0,000            | 0,0 | 0,000 | 0,0 | 0,000 | 0,0 | 0,014  | 0,0 | 0,000 | 0,0 | 0,000 | 0,0 | 0,018         | 0,0 | 0,000 | 0,0 | 0,003 | 0,0 | 0,000   | 0,000 | 0,000  |
| 15        | Isobutyl acetate               | 0,011            | 0,0 | 0,025 | 0,0 | 0,035 | 0,0 | 0,052  | 0,0 | 0,102 | 0,0 | 0,068 | 0,0 | 0,048         | 0,0 | 0,091 | 0,0 | 0,011 | 0,0 | 0,000   | 0,001 | 0,005  |
| 16        | Butyl acetate                  | 0,044            | 0,0 | 0,313 | 0,1 | 0,165 | 0,1 | 0,154  | 0,0 | 0,281 | 0,0 | 0,091 | 0,0 | 0,169         | 0,0 | 0,298 | 0,0 | 0,061 | 0,0 | 0,996   | 0,000 | 0,013  |
| 17        | Isoamyl acetate                | 0,083            | 0,0 | 0,252 | 0,2 | 0,295 | 0,1 | 0,899  | 0,5 | 1,784 | 0,9 | 0,828 | 0,1 | 0,987         | 0,5 | 1,802 | 0,8 | 0,618 | 0,3 | 0,012   | 0,067 | 0,489  |
| 18        | Amyl acetate                   | 0,000            | 0,0 | 0,000 | 0,0 | 0,033 | 0,0 | 0,057  | 0,0 | 0,069 | 0,0 | 0,031 | 0,0 | 0,060         | 0,0 | 0,076 | 0,0 | 0,000 | 0,0 | 0,020   | 0,150 | 0,045  |
| 19        | Prenyl acetate                 | 0,000            | 0,0 | 0,016 | 0,0 | 0,022 | 0,0 | 0,000  | 0,0 | 0,000 | 0,0 | 0,086 | 0,0 | 0,000         | 0,0 | 0,000 | 0,0 | 0,000 | 0,0 | 0,002   | 0,000 | 0,001  |
| 20        | (E)-2-Methyl-2-butenyl acetate | 0,000            | 0,0 | 0,000 | 0,0 | 0,000 | 0,0 | 0,086  | 0,0 | 0,112 | 0,0 | 0,000 | 0,0 | 0,081         | 0,0 | 0,133 | 0,0 | 0,118 | 0,0 | 0,000   | 0,000 | 0,000  |
| 21        | Hexyl acetate                  | 0,031            | 0,0 | 0,309 | 0,3 | 0,119 | 0,0 | 0,480  | 0,0 | 1,163 | 0,3 | 0,226 | 0,1 | 0,467         | 0,0 | 1,456 | 0,0 | 0,052 | 0,0 | 0,000   | 0,000 | 0,001  |

|    |                        |       |     |       |     |       |     |       |     |       |     |       |     |       |     |       |     |       |     |       |       |       |
|----|------------------------|-------|-----|-------|-----|-------|-----|-------|-----|-------|-----|-------|-----|-------|-----|-------|-----|-------|-----|-------|-------|-------|
| 22 | 3-Hexenyl acetate      | 0,000 | 0.0 | 0,000 | 0.0 | 0,000 | 0.0 | 0,016 | 0,0 | 0,027 | 0,0 | 0,000 | 0.0 | 0,000 | 0.0 | 0,029 | 0,0 | 0,000 | 0.0 | 0,000 | 0,000 | 0,000 |
| 23 | Butylcaproate          | 0,015 | 0,0 | 0,050 | 0,0 | 0,043 | 0,0 | 0,020 | 0,0 | 0,026 | 0,0 | 0,000 | 0.0 | 0,024 | 0,0 | 0,025 | 0,0 | 0,028 | 0,0 | 0,147 | 0,057 | 0,002 |
| 24 | Hexylbutyrate          | 0,000 | 0.0 | 0,000 | 0.0 | 0,066 | 0,0 | 0,019 | 0,0 | 0,035 | 0,0 | 0,000 | 0.0 | 0,024 | 0,0 | 0,098 | 0,1 | 0,000 | 0.0 | 0,000 | 0,000 | 0,001 |
| 25 | Hexyl n-valerate       | 0,031 | 0,0 | 0,149 | 0,1 | 0,279 | 0,1 | 0,128 | 0,0 | 0,216 | 0,0 | 0,000 | 0.0 | 0,134 | 0,0 | 0,141 | 0,1 | 0,106 | 0,0 | 0,527 | 0,157 | 0,007 |
| 26 | Isoamylcaproate        | 0,000 | 0.0 | 0,000 | 0.0 | 0,000 | 0.0 | 0,000 | 0.0 | 0,000 | 0.0 | 0,000 | 0.0 | 0,000 | 0.0 | 0,000 | 0.0 | 0,014 | 0,0 | 0,009 | 0,009 | 0,005 |
| 27 | 2-hexenyl butyrate     | 0,000 | 0.0 | 0,000 | 0.0 | 0,000 | 0.0 | 0,000 | 0.0 | 0,000 | 0.0 | 0,000 | 0.0 | 0,000 | 0.0 | 0,000 | 0.0 | 0,008 | 0,0 | 0,006 | 0,006 | 0,003 |
| 28 | Pentylhexanoate        | 0,021 | 0,0 | 0,059 | 0,0 | 0,171 | 0,1 | 0,032 | 0,0 | 0,031 | 0,0 | 0,023 | 0,0 | 0,035 | 0,0 | 0,054 | 0,0 | 0,061 | 0,0 | 0,033 | 0,031 | 0,034 |
| 29 | butylcaprylate         | 0,000 | 0.0 | 0,000 | 0.0 | 0,000 | 0.0 | 0,007 | 0,0 | 0,000 | 0.0 | 0,000 | 0.0 | 0,012 | 0,0 | 0,014 | 0,0 | 0,000 | 0.0 | 0,000 | 0,003 | 0,005 |
| 30 | Ethyldecanoate         | 0,010 | 0,0 | 0,000 | 0.0 | 0,013 | 0,0 | 0,000 | 0.0 | 0,000 | 0.0 | 0,000 | 0.0 | 0,000 | 0.0 | 0,000 | 0.0 | 0,000 | 0.0 | 0,000 | 0,000 | 0,000 |
| 31 | Phenylmethyl acetate   | 0,000 | 0.0 | 0,000 | 0.0 | 0,000 | 0.0 | 0,000 | 0.0 | 0,000 | 0.0 | 0,326 | 0,1 | 0,000 | 0.0 | 0,000 | 0.0 | 0,000 | 0.0 | 0,000 | 0,000 | 0,000 |
| 32 | Hexylcaprylate         | 0,000 | 0.0 | 0,000 | 0.0 | 0,000 | 0.0 | 0,010 | 0,0 | 0,000 | 0.0 | 0,000 | 0.0 | 0,031 | 0,0 | 0,000 | 0.0 | 0,009 | 0,0 | 0,000 | 0,000 | 0,000 |
| 33 | Butanol                | 0,020 | 0,0 | 0,071 | 0,0 | 0,055 | 0,0 | 0,050 | 0,0 | 0,000 | 0.0 | 0,000 | 0.0 | 0,063 | 0,0 | 0,000 | 0.0 | 0,000 | 0.0 | 0,002 | 0,007 | 0,000 |
| 34 | Isolamylalcohol        | 0,078 | 0,0 | 0,132 | 0,0 | 0,162 | 0,0 | 0,303 | 0,0 | 0,000 | 0.0 | 0,308 | 0,0 | 0,319 | 0,0 | 0,000 | 0.0 | 0,132 | 0,2 | 0,090 | 0,001 | 0,003 |
| 35 | Prenol/2-Heptanol      | 0,000 | 0.0 | 0,000 | 0.0 | 0,012 | 0,0 | 0,021 | 0,0 | 0,035 | 0,0 | 0,000 | 0.0 | 0,021 | 0,0 | 0,040 | 0,0 | 0,041 | 0,0 | 0,001 | 0,137 | 0,021 |
| 36 | Hexanol                | 1,016 | 0,1 | 1,110 | 0,0 | 1,090 | 0,0 | 0,828 | 0,0 | 0,680 | 0,0 | 0,393 | 0,1 | 0,860 | 0,1 | 0,720 | 0,1 | 0,175 | 0,1 | 0,000 | 0,000 | 0,000 |
| 37 | 3-Hexen-1-ol           | 0,006 | 0,0 | 0,134 | 0,1 | 0,000 | 0.0 | 0,000 | 0.0 | 0,000 | 0.0 | 0,000 | 0.0 | 0,009 | 0,0 | 0,000 | 0.0 | 0,041 | 0,1 | 0,103 | 0,155 | 0,032 |
| 38 | 2-Hexen-1-ol           | 0,222 | 0,0 | 0,000 | 0.0 | 0,032 | 0,0 | 0,065 | 0,0 | 0,000 | 0.0 | 0,056 | 0,0 | 0,062 | 0,0 | 0,000 | 0.0 | 0,000 | 0.0 | 0,000 | 0,000 | 0,000 |
| 39 | 1 Octen-3-ol           | 0,005 | 0,0 | 0,025 | 0,0 | 0,033 | 0,0 | 0,000 | 0.0 | 0,020 | 0,0 | 0,015 | 0,0 | 0,007 | 0,0 | 0,016 | 0,0 | 0,000 | 0.0 | 0,015 | 0,004 | 0,033 |
| 40 | 1-heptanol             | 0,010 | 0,0 | 0,000 | 0.0 | 0,025 | 0,0 | 0,000 | 0.0 | 0,021 | 0,0 | 0,000 | 0.0 | 0,000 | 0.0 | 0,000 | 0.0 | 0,000 | 0.0 | 0,000 | 0,014 | 0,000 |
| 41 | 6-Methyl-5-hepten-2-ol | 0,006 | 0,0 | 0,090 | 0,1 | 0,000 | 0.0 | 0,024 | 0,0 | 0,000 | 0.0 | 0,067 | 0,0 | 0,024 | 0,0 | 0,065 | 0,0 | 0,032 | 0,0 | 0,786 | 0,162 | 0,033 |
| 42 | 2-Ethyl-1-hexanol      | 0,005 | 0,0 | 0,012 | 0,0 | 0,000 | 0.0 | 0,011 | 0,0 | 0,014 | 0,0 | 0,014 | 0,0 | 0,012 | 0,0 | 0,014 | 0,0 | 0,012 | 0,0 | 0,000 | 0,001 | 0,001 |
| 43 | Octanol                | 0,012 | 0,0 | 0,025 | 0,0 | 0,039 | 0,0 | 0,038 | 0,0 | 0,042 | 0,0 | 0,024 | 0,0 | 0,040 | 0,0 | 0,026 | 0,0 | 0,015 | 0,0 | 0,177 | 0,584 | 0,015 |
| 44 | 2-Octen-1-ol           | 0,000 | 0.0 | 0,000 | 0.0 | 0,021 | 0,0 | 0,000 | 0.0 | 0,000 | 0.0 | 0,000 | 0.0 | 0,000 | 0.0 | 0,000 | 0.0 | 0,000 | 0.0 | 0,000 | 0,000 | 0,000 |
| 45 | Nonanol                | 0,010 | 0,0 | 0,011 | 0,0 | 0,000 | 0.0 | 0,000 | 0.0 | 0,000 | 0.0 | 0,000 | 0.0 | 0,000 | 0.0 | 0,000 | 0.0 | 0,000 | 0.0 | 0,000 | 0,010 | 0,005 |
| 46 | PhenylethylAlcohol     | 0,000 | 0.0 | 0,000 | 0.0 | 0,021 | 0,0 | 0,000 | 0.0 | 0,000 | 0.0 | 0,000 | 0.0 | 0,000 | 0.0 | 0,000 | 0.0 | 0,000 | 0.0 | 0,000 | 0,000 | 0,000 |
| 47 | Linalool               | 0,003 | 0,0 | 0,000 | 0.0 | 0,011 | 0,0 | 0,000 | 0.0 | 0,000 | 0.0 | 0,000 | 0.0 | 0,000 | 0.0 | 0,000 | 0.0 | 0,006 | 0,0 | 0,000 | 0,000 | 0,000 |
